# Supplementary material
Source: Research Square preprint supplement (doi:10.21203/rs.3.rs-8654777/v1)
Supplement: Supplementary file 2 [file 8f84064ff891609e3d0c23c2.docx]

# Supplementary File X. Full-length uncropped western blots


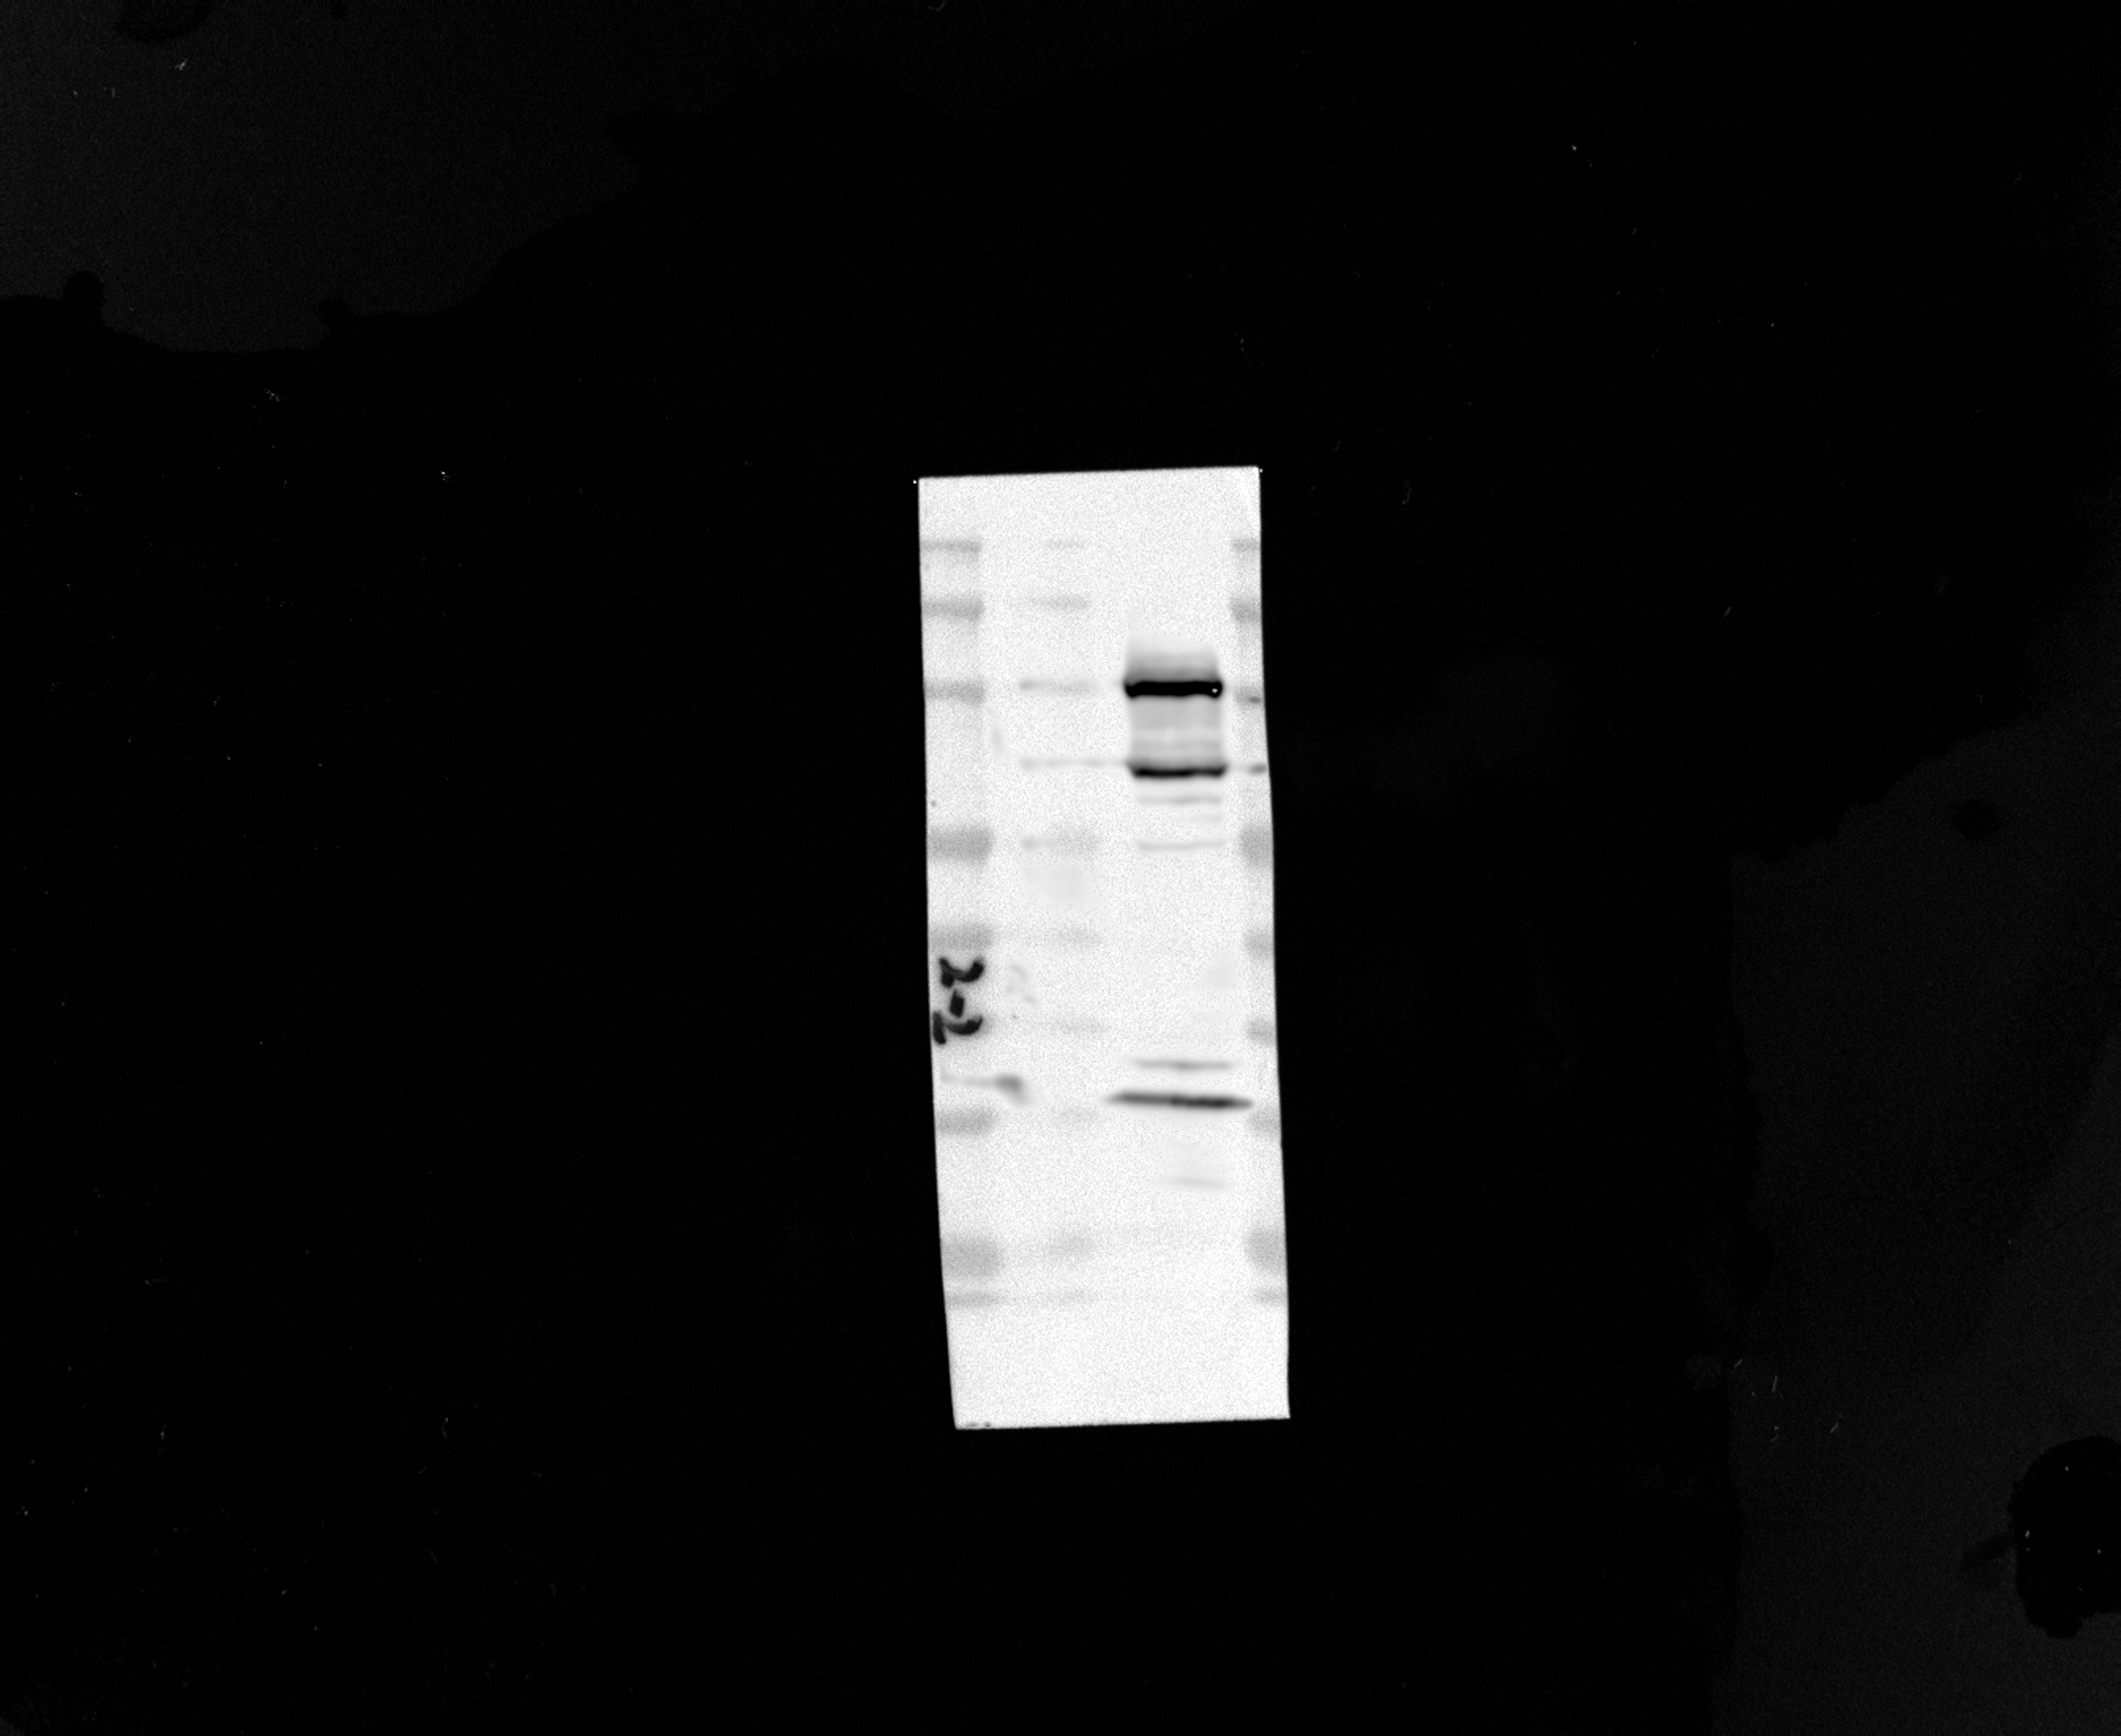


FLAG-FMR1. Full-length, uncropped, unprocessed western blot corresponding to Figure 1B (FMR1 overexpression).


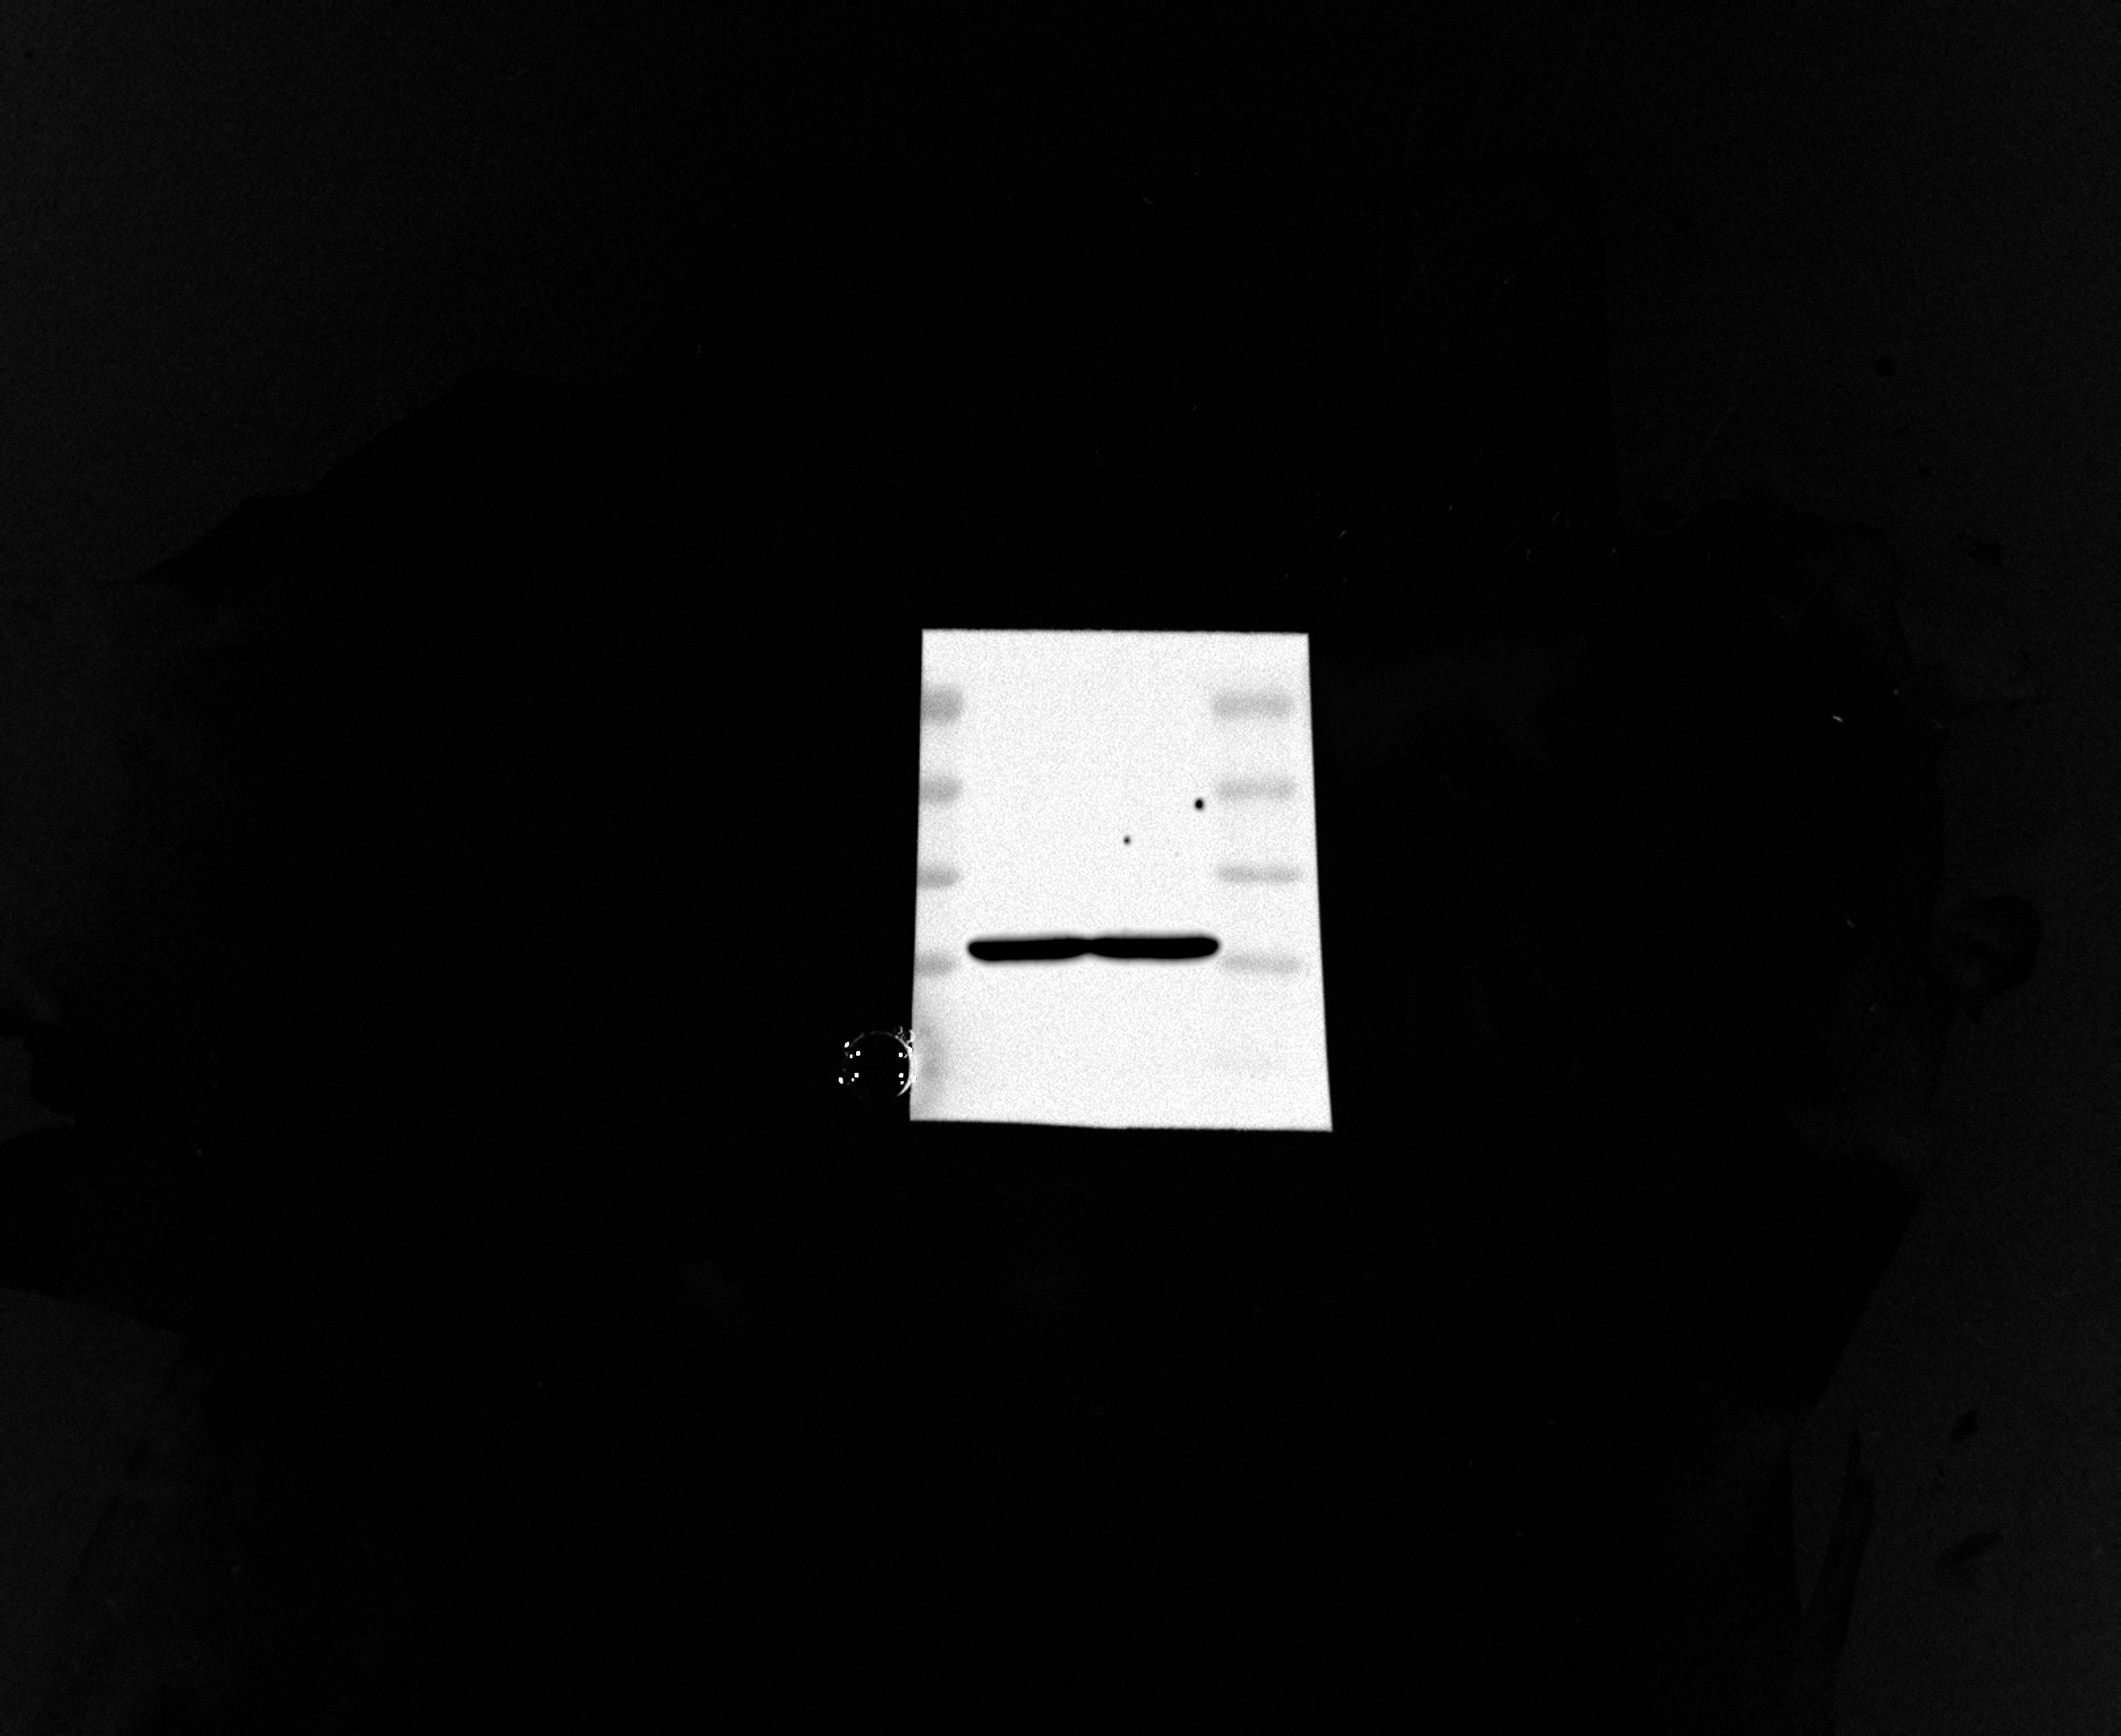


FLAG-GAPDH. Full-length, uncropped, unprocessed GAPDH loading control blot corresponding to Figure 1B.


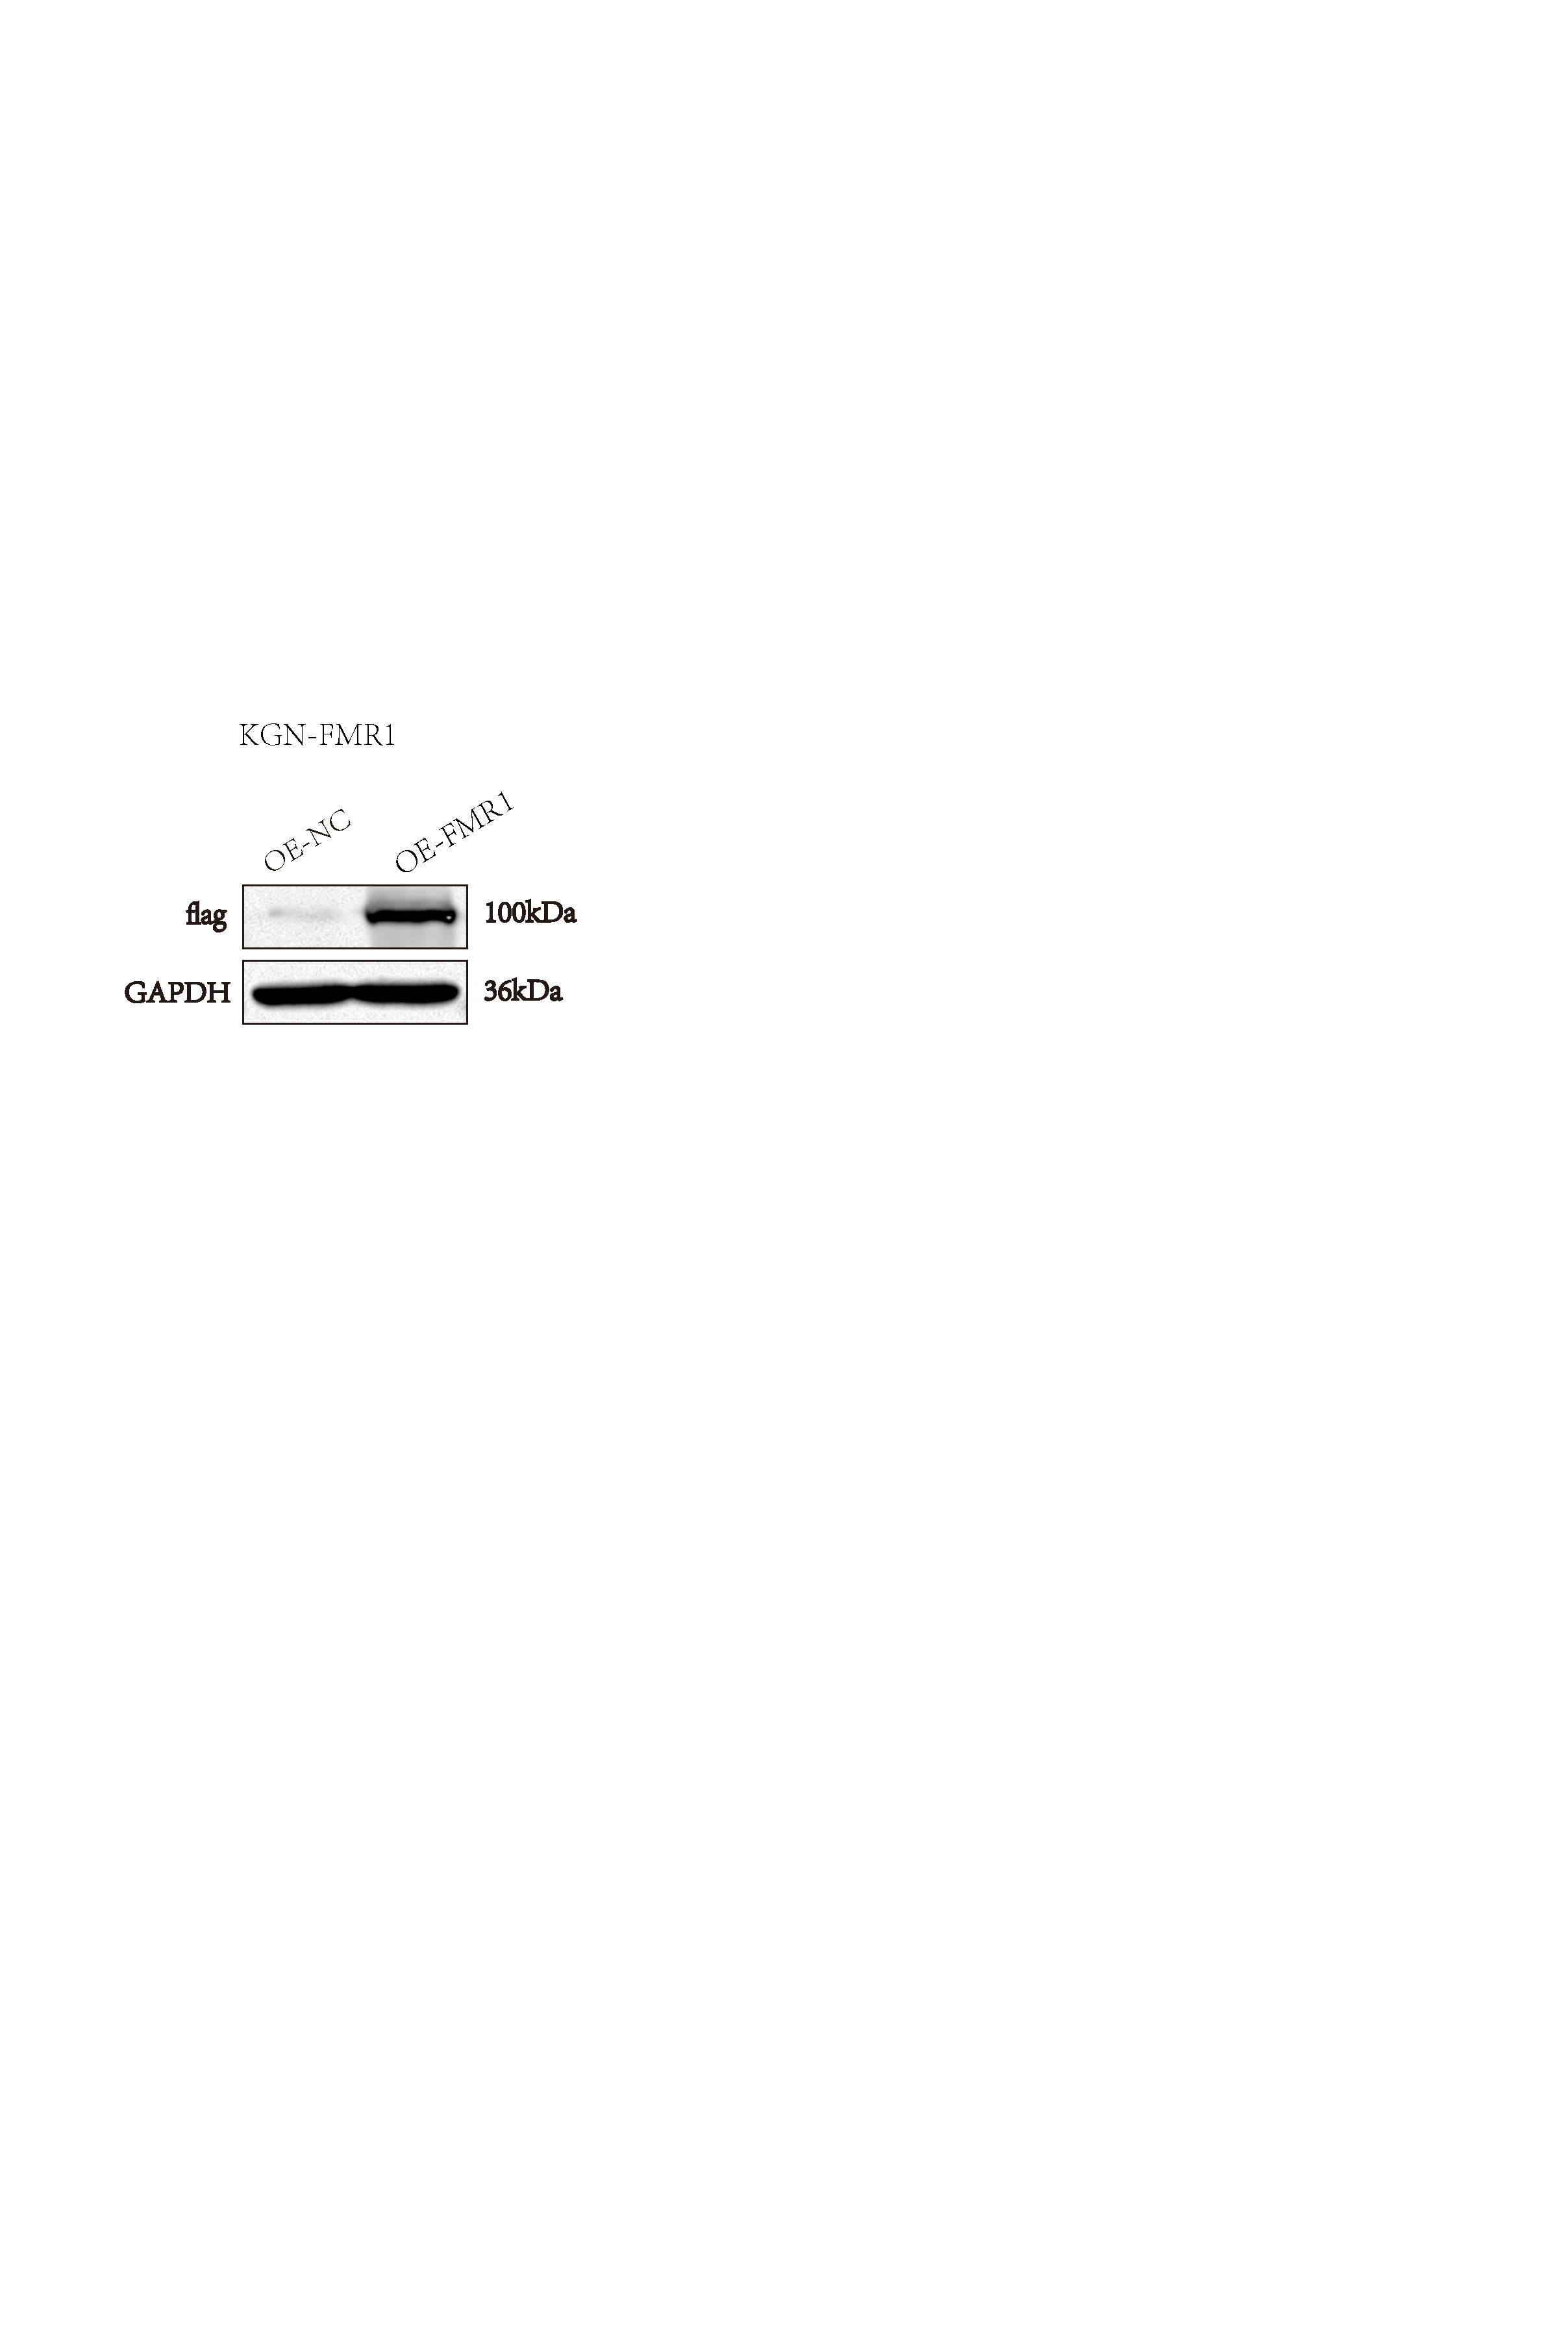


KGN-FMR1. Representative western blot showing endogenous FMR1 protein expression in KGN cells shown in Figure 1B.
